# Supplementary material
Source: MDPI journal article supplement (https://www.mdpi.com/1996-1073/3/12/1895)
Supplement: s1 [file s1]

*Correction*

## **Creating a Global Grid of Distributed Fossil Fuel CO<sub>2</sub> Emissions from Nighttime Satellite Imagery**

*Published: 24 March 2011*

---

A new version of the paper [1] was uploaded today. A typo on Page 1898 was corrected. Figure 6 was replaced with a correct one. We would like to apologize for any inconvenience caused to our readers.

*Energies* Editorial Office

### **References**

1. Ghosh, T.; Elvidge, C.D.; Sutton, P.C.; Baugh, K.E.; Ziskin, D.; Tuttle, B.T. Creating a Global Grid of Distributed Fossil Fuel CO<sub>2</sub> Emissions from Nighttime Satellite Imagery. *Energies* **2010**, *3*, 1895–1913.
